**Smoking is associated with significantly increased green autofluorescence intensity and asymmetry of the skin and the fingernails of natural populations, population at-risk of developing stroke, and population of acute ischemic stroke**

Mingchao Zhang<sup>1,2,\*</sup>, Yue Tao<sup>1,2,\*</sup>, Danhong Wu<sup>3</sup>, Weihai Ying<sup>1,2,#</sup>

<sup>1</sup>Med-X Research Institute and School of Biomedical Engineering, Shanghai Jiao Tong University, Shanghai 200030, P.R. China; <sup>2</sup>Collaborative Innovation Center for Genetics and Development, Shanghai 200043, P.R. China; <sup>3</sup>Department of Neurology, Shanghai Fifth People's Hospital, Fudan University, Shanghai, P.R. China

\* These two authors contributed equally to this work.

#: Corresponding author

Weihai Ying, Ph.D.

Professor, School of Biomedical Engineering and Med-X Research Institute

Shanghai Jiao Tong University

1954 Huashan Road

Shanghai, 200030, P.R. China

E-mail: weihaiy@sjtu.edu.cn

NOTE: This preprint reports new research that has not been certified by peer review and should not be used to guide clinical practice.

## Abstract

Our previous studies have suggested that the ‘Pattern of Autofluorescence (AF)’ of the skin and fingernails is a novel biomarker for non-invasive diagnosis of several major diseases. In order to improve this new technology, it is critical to further investigate the factors that can influence the AF in natural populations, populations at-risk of developing major diseases and patient populations. Our current study found that both the green AF intensity and the AF asymmetry of the fingernails and the skin of Dorsal Index Fingers of the smokers were significantly higher than those of the non-smokers in natural populations and the population at-risk of developing stroke. In the population of acute ischemic stroke patients, the green AF intensity of the fingernails and the skin of Dorsal Index Fingers, Ventroforefingers and Centremetacarpus of the smokers was significantly higher than that of the non-smokers. In both fingernails and Dorsal Index Fingers, the AF intensity of the male persons was also significantly higher than that of the female persons, while the AF intensity of the male non-smokers was similar with that of female non-smokers. Collectively, our study has indicated that smoking is an important factor associated with significantly increased AF intensity and AF asymmetry of the fingernails and certain positions of the skin in these populations, which is critical for understanding the mechanisms underlying the changes of the AF in these populations. Our study has also indicated smoking as a key factor for gender differences in the AF intensity at fingernails and Dorsal Index Fingers.

**Keywords:** Smoking; Autofluorescence; Skin; Fingernails; Stroke

## Introduction

Our previous studies have indicated that several properties of the green autofluorescence (AF), including intensity, asymmetry and structure, of the fingernails and multiple positions of the skin can form ‘Pattern of AF’ (1-3). Our study has suggested that the ‘Pattern of AF’ is a novel biomarker that can be used for non-invasive diagnosis of several major diseases including acute ischemic stroke (AIS), lung cancer, Parkinson’s disease, stable coronary disease and myocardial ischemia (1-5). This new strategy forms a basis for establishing a novel biomedical imaging technology, which may have profound and wide applications in disease diagnosis and evaluations of the health conditions of natural populations.

Our study has indicated the following mechanisms underlying the increased AF(1): 1) Both inflammation and oxidative stress can lead to increased epidermal green AF, showing significant associations between the AF intensity and the level of inflammation or oxidative stress. 2) Development of lung cancer in mice can lead to increased epidermal green AF, indicating that development of such major diseases as lung cancer is sufficient to induce the increases in the epidermal green AF. 3) Keratin 1 degradation mediates the inflammation- and oxidative stress-induced increases in the epidermal AF. In order to improve this novel technology, it is critical to further study the mechanisms underlying the changes of the AF of human body. One of the important studies is to further discover the factors that can influence the AF.

Smoking is an important risk factor for multiple major diseases including lung cancer, AIS and cardiovascular diseases (6-8), which can induce both inflammation (9, 10) and oxidative stress (11, 12) in the body. Therefore, we hypothesized that smoking may be a significant factor that can increase the AF of both the skin and the fingernails.

We tested this hypothesis in our current study, showing that smoking is an important factor that are associated with significantly increased green AF intensity and AF asymmetry of both the fingernails and certain locations of the skin of natural populations, populations at-risk of developing stroke, and AIS populations.

## **Methods and Materials**

### **Studies on Human Subjects**

The study was conducted according to a protocol approved by the Ethics Committee of Shanghai Fifth People's Hospital affiliated to Fudan University. The human subjects in our study were divided into four groups: Group 1: The natural populations; Group 2: The healthy population; Group 3: The population at-risk of developing stroke; and Group 4: The population of the AIS patients who were hospitalized in the Department of Neurology, Shanghai Fifth People's Hospital affiliated to Fudan University. The age of Group 1, Group 2, Group 3 and Group 4 was  $67.27 \pm 8.25$ ,  $60.94 \pm 12.98$ ,  $68.09 \pm 8.06$ , and  $64.11 \pm 8.20$  years of old, respectively.

### **Determinations of the AF of human subjects' skin and fingernails**

A portable AF imaging equipment was used to determine the skin' AF of the human subjects. The excitation wavelength was 485 nm, and the emission wavelength was 500 - 550 nm.

## Statistical analyses

All data are presented as mean  $\pm$  SEM. Data were assessed by one-way ANOVA, followed by Student - Newman - Keuls *post hoc* test, except where noted. *P* values less than 0.05 were considered statistically significant.

## Results

**1) Both the green AF intensity and the AF asymmetry of the fingernails and the skin of Dorsal Index Fingers of the smokers in natural populations were significantly higher than those of the non-smokers**

We determined the green AF intensity of the fingernails and twelve positions of the skin of natural populations. Compared with the green AF intensity of the fingernails and the Dorsal Index Fingers of the non-smokers, the green AF intensity of both the fingernails and the Dorsal Index Fingers of the smokers was significantly higher (Figs. 1A and 1B). In contrast, no significant difference was observed between the green AF intensity of the non-smokers and that of the smokers at other examined positions of the skin (Supplement Figs. 1A, 1B, 1C, 1D, and 1E).

Compared with the AF asymmetry of both the fingernails and the Dorsal Index Fingers of the non-smokers, the AF asymmetry of both the fingernails and the Dorsal Index Fingers of the smokers was also remarkably higher (Figs. 2A and 2B). In contrast, no significant difference was observed between the AF asymmetry of the non-smokers and that of the smokers at other examined positions of the skin (Supplement Figs. 2A, 2B, 2C, 2D and 2E).

**2) Both the green AF intensity and the AF asymmetry of the fingernails and the skin of Dorsal Index Fingers of the smokers in the population at-risk of developing stroke were significantly higher than those of the non-smokers**

We also determined the green AF intensity of the fingernails and twelve positions of the skin of the population at-risk of developing stroke. Compared with the green AF intensity of the fingernails and the Dorsal Index Fingers of the non-smokers, the green AF intensity of both the fingernails and the Dorsal Index Fingers of the smokers was significantly higher (Figs. 3A and 3B). In contrast, no significant difference was observed between the green AF intensity of the non-smokers and that of the smokers at other examined positions of the skin (Supplement Figs. 3A, 3B, 3C, 3D, and 3E).

Compared with the AF asymmetry of the fingernails and the Dorsal Index Fingers of the non-smokers, the AF asymmetry of both the fingernails and the Dorsal Index Fingers of the smokers was also significantly higher (Figs. 4A and 4B). In contrast, no significant difference was observed between the AF asymmetry of the non-smokers and that of the smokers at other examined positions of the skin (Supplement Figs. 4A, 4B, 4C, 4D, and 4E).

**3) Both the green AF intensity and the AF asymmetry of the fingernails and certain positions of the skin of the smokers in AIS population were significantly higher than those of the non-smokers**

We determined the green AF intensity of the fingernails and twelve positions of the skin of the AIS patients. In nearly all of the positions examined, the AF intensity of both the non-smokers and the smokers in the AIS population was significantly higher

than that of the healthy population (Figs. 5A, 5B, 5C and 5D; Supplement Figs. 5A, 5B and 5C). Compared with the green AF intensity of the non-smokers in their fingernails and skin of Dorsal Index Fingers, Vetroforefingers and the left Centrametacarpus, the green AF intensity at these positions of the smokers was significantly higher (Figs. 5A, 5B, 5C and 5D). In contrast, no significant difference was observed between the green AF intensity of the non-smokers and that of the smokers at other examined positions of the skin (Supplement Figs. 5A, 5B and 5C).

Compared with the AF asymmetry of the non-smokers in their fingernails and the skin of Centremetacarpus, the AF asymmetry of the smokers in these positions was also remarkably higher (Figs. 6A and 6B). In contrast, no significant difference was observed between the AF asymmetry of the non-smokers and that of the smokers at other examined positions of the skin (Supplement Figs. 6A, 6B, 6C, 6D, and 6E).

**4) Both the green AF intensity and the AF asymmetry of the fingernails and certain positions of the skin of the male persons in the natural populations were significantly different from those of the female persons**

We determined the green AF intensity of the fingernails and twelve positions of the skin of both male persons and female persons in the natural populations. In both right and left fingernails and the Dorsal Index Fingers, the AF intensity of the male persons was significantly higher than that of the female persons (Figs. 7A and 7B). In both right Centremetacarpus and right Dorsal Centremetacarpus, the AF intensity of the male persons was also significantly higher than that of the female persons (Figs. 7C and 7D). In the left Ventriantebrachium, the AF intensity of the male persons was significantly lower than that of the female persons (Fig. 7E). In contrast, in both Vetroforefingers

and Dorsal Antebrachium, the AF intensity of the male persons was not significantly different from that of the female persons (Supplemental Figs. 7A and 7B).

Compared with the AF asymmetry of both the fingernails and the Dorsal Index Fingers of the female persons, the AF asymmetry of both the fingernails and the Dorsal Index Fingers of the male persons was also significantly higher (Figs. 8A and 8B). In contrast, no significant difference was observed between the AF asymmetry of the male persons and that of the female persons at other examined positions of the skin (Supplement Figs. 8A, 8B, 8C, 8D and 8E).

**5) There were significant differences among male smokers, male non-smokers, female smokers and female non-smokers in the green AF intensity and the AF asymmetry of the fingernails and certain positions of the skin in the natural populations**

We determined the green AF intensity of the fingernails and twelve positions of the skin of the male smokers, male non-smokers, female non-smokers and female smokers in the natural populations. In both right and left fingernails, the AF intensity of the male smokers was significantly higher than that of the male non-smokers, female non-smokers and female smokers (Fig. 9A). In both right and left Dorsal Index Fingers, the AF intensity of the male smokers was significantly higher than that of the male non-smokers and female non-smokers (Fig. 9B). In contrast, no significant difference was observed between the AF intensity of the male smokers and that of the male non-smokers, female smokers, and female non-smokers at other examined positions of the skin (Supplement Figs. 9A, 9B, 9C, 9D and 9E).



Compared with the AF asymmetry of both the fingernails and the Dorsal Index Fingers of the male non-smokers and female non-smokers, the AF asymmetry of both the fingernails and the Dorsal Index Fingers of the male smokers was also significantly higher (Figs. 10A and 10B). In contrast, no significant difference was observed between the AF asymmetry of the male smokers and that of the male non-smokers, female non-smokers and female smokers at other examined positions of the skin (Supplement Figs. 10A, 10B, 10C, 10D and 10E).

## **Discussion**

The major findings of our current study include: First, both the green AF intensity and the AF asymmetry of the fingernails and the skin of Dorsal Index Fingers of the smokers were significantly higher than those of the non-smokers in natural populations. Second, both the green AF intensity and the AF asymmetry of the fingernails and the skin of Dorsal Index Fingers of the smokers were significantly higher than those of the non-smokers in the population at-risk of developing stroke. Third, in the AIS population, the green AF intensity of the fingernails and the skin of Dorsal Index Fingers, Ventroforefingers and Centremetacarpus of the smokers was significantly higher than that of the non-smokers; and the asymmetry of the fingernails and the skin of Centremetacarpus of the smokers was significantly higher than that of the non-smokers. Fourth, in both fingernails and Dorsal Index Fingers, the AF intensity of the male persons was also significantly higher than that of the female persons, while the AF intensity of the male non-smokers was similar with that of female non-smokers.

Our previous studies have suggested that the ‘Pattern of AF’ is a novel biomarker that can be used for non-invasive diagnosis of several major diseases, which

forms a basis for establishing a new biomedical imaging technology (1-3). In order to improve this new technology, it is critical to further investigate the factors that can influence the AF in natural populations, the populations at-risk of developing major diseases as well as patient populations. Our current study has indicated that smoking is an important factor that is associated with increased AF intensity and AF asymmetry of the fingernails and certain positions of the skin in these populations. These findings are highly valuable for understanding the mechanisms underlying the changes of the AF in these populations, which is required for establishing the AF-based models for disease diagnosis and evaluations of health conditions of natural populations.

Our previous study has shown that both inflammation and oxidative stress can dose-dependently increase the epidermal green AF (1). It is established that smoking can cause increased inflammation and oxidative stress in human body (9-12). Therefore, we propose that the capacity of smoking to increase the AF in these populations may result from the capacity of smoking to increase inflammation and oxidative stress in the body of these populations.

It is noteworthy that in these populations, smoking was selectively associated with increased AF intensity of the fingernails and the skin of Dorsal Index Fingers. Since it takes a significant duration of time for the growth of nails, we propose that increased AF of the nails is a biomarker for the levels of chronic exposures of the nails to inflammation and oxidative stress in the body. Based on this proposal, it is reasonable to observe the increased AF in the fingernails in these populations. Future studies are required to investigate the mechanisms underlying the AF of the nails.

Based on the observations of our previous studies, we have proposed that the positions with increased AF in the skin are associated with the 'channels' (or called

Meridian) in traditional Chinese medicine, which link the diseased organs. According to the theory of the Meridian theory, the skin of Dorsal Index Fingers is close to the Large Intestine Meridian. Therefore, our finding that smoking increases the AF of the skin of Dorsal Index Fingers has implicated that smoking may increase the inflammation and oxidative stress of the organs that are associated with the Large Intestine Meridian.

Our study has found that smoking can enhance not only the green AF intensity but also the AF asymmetry of the fingernails and certain positions of the skin in these populations. Our previous study has indicated that high levels of AF asymmetry are associated with major vascular diseases such as AIS (2). Therefore, we propose that smoking may have particularly strong capacity to increase vascular damage, which is consistent with previous reports (12).

Our study has shown that in both right and left fingernails and the Dorsal Index Fingers, the AF intensity of the male persons was significantly higher than that of the female persons. Our study has also shown that male non-smokers and female non-smokers had similar AF intensity at these positions. Collectively, these pieces of information have suggested that smoking is a key factor accounting for the gender differences in the AF.

## **Acknowledgment**

The authors would like to acknowledge the financial support by two research grants from a Major Special Program Grant of Shanghai Municipality (Grant # 2017SHZDZX01) (to W.Y.) and a Major Research Grant from the Scientific Committee of Shanghai Municipality #16JC1400502 (to W.Y.).

## References:

1. Zhang, M., Li, Y., Maharjan, D. T., He, H., Tao, Y., Wu, D., Ying, W. (2019) Keratin-Based Epidermal Green Autofluorescence is a Common Biomarker of Organ Injury. *bioRxiv* 564112
2. Wu, D., Zhang, M., Tao, Y., Li, Y., Zhang, S., Chen, X., Ying, W. (2018) Distinct pattern of autofluorescence of the skin and fingernails of acute ischemic stroke patients: A novel diagnostic biomarker for acute ischemic stroke. *bioRxiv* 310904
3. Zhang, M., Tao, Y., Chang, Y., Li, Y., Chu, T., Ying, W. (2020) Selectively increased autofluorescence at certain locations of skin may become a novel diagnostic biomarker for lung cancer. *bioRxiv* 315440
4. Wu, D., Tao, Y., Zhang, M., Li, Y., Shen, L., Li, Y., Ying, W. (2018) Selectively increased autofluorescence at fingernails and certain regions of skin: A potential novel diagnostic biomarker for Parkinson disease. *bioRxiv* 322222
5. Qu, X., Li, Y., Tao, Y., Zhang, M., Wu, D., Guan S., Han, W., Ying, W. (2018) Distinct Patterns of the Autofluorescence of Body Surface: Potential Novel Diagnostic Biomarkers for Stable Coronary Artery Disease and Myocardial Infarction. *bioRxiv* 330985
6. Larsson, S. C., Burgess, S., and Michaelsson, K. (2019) Smoking and stroke: A mendelian randomization study. *Ann Neurol* **86**, 468-471
7. Markidan, J., Cole, J. W., Cronin, C. A., Merino, J. G., Phipps, M. S., Wozniak, M. A., and Kittner, S. J. (2018) Smoking and Risk of Ischemic Stroke in Young Men. *Stroke* **49**, 1276-1278

8. Ambrose, J. A., and Barua, R. S. (2004) The pathophysiology of cigarette smoking and cardiovascular disease: an update. *J Am Coll Cardiol* **43**, 1731-1737
9. McEvoy, J. W., Nasir, K., DeFilippis, A. P., Lima, J. A., Bluemke, D. A., Hundley, W. G., Barr, R. G., Budoff, M. J., Szklo, M., Navas-Acien, A., Polak, J. F., Blumenthal, R. S., Post, W. S., and Blaha, M. J. (2015) Relationship of cigarette smoking with inflammation and subclinical vascular disease: the Multi-Ethnic Study of Atherosclerosis. *Arterioscler Thromb Vasc Biol* **35**, 1002-1010
10. Rom, O., Avezov, K., Aizenbud, D., and Reznick, A. Z. (2013) Cigarette smoking and inflammation revisited. *Respir Physiol Neurobiol* **187**, 5-10
11. Dikalov, S., Itani, H., Richmond, B., Vergeade, A., Rahman, S. M. J., Boutaud, O., Blackwell, T., Massion, P. P., Harrison, D. G., and Dikalova, A. (2019) Tobacco smoking induces cardiovascular mitochondrial oxidative stress, promotes endothelial dysfunction, and enhances hypertension. *Am J Physiol Heart Circ Physiol* **316**, H639-H646
12. Siasos, G., Tsigkou, V., Kokkou, E., Oikonomou, E., Vavuranakis, M., Vlachopoulos, C., Verveniatis, A., Limperi, M., Genimata, V., Papavassiliou, A. G., Stefanadis, C., and Tousoulis, D. (2014) Smoking and atherosclerosis: mechanisms of disease and new therapeutic approaches. *Curr Med Chem* **21**, 3936-3948

### **Figure Legends:**

**Fig. 1. The green AF intensity of the fingernails and the skin of Dorsal Index Fingers of the smokers in natural populations was significantly higher than that of the non-smokers.** (A) In both right and left fingernails, the AF intensity of the smokers in natural populations was significantly higher than that of the non-smokers. (B) In both right and left Dorsal Index Fingers, the AF intensity of the smokers in natural populations was significantly higher than that of the non-smokers. The number of the non-smokers and the smokers was 280 and 47, respectively. \*\*\*,  $p < 0.001$ .

**Fig. 2. The AF asymmetry of the fingernails and the skin of Dorsal Index Fingers of the smokers in natural populations were significantly higher than that of the non-smokers.** (A) In both right and left fingernails, the AF asymmetry of the smokers in natural populations was significantly higher than that of the non-smokers. (B) In both right and left Dorsal Index Fingers, the AF asymmetry of the smokers in natural populations was significantly higher than that of the non-smokers. The number of the non-smokers and the smokers was 280 and 47, respectively. \*\*\*,  $p < 0.001$ .

**Fig. 3. The green AF intensity of the fingernails and the skin of Dorsal Index Fingers of the smokers in the population at-risk of developing stroke was significantly higher than that of the non-smokers.** (A) In both right and left fingernails, the AF intensity of the smokers in the population at-risk of developing stroke was significantly higher than that of the non-smokers. (B) In both right and left Dorsal Index Fingers, the AF intensity of the smokers in the population at-risk of

developing stroke was significantly higher than that of the non-smokers. The number of the healthy non-smokers, the non-smokers of the population at-risk of developing stroke, and the smokers of the population at-risk of developing stroke was 56,130, and 39, respectively. \*,  $p < 0.05$  ; \*\*\*,  $p < 0.001$ .

**Fig. 4. The AF asymmetry of the fingernails and the skin of Dorsal Index Fingers of the smokers in the population at-risk of stroke was significantly higher than that of the non-smokers.** (A) In both right and left fingernails, the AF asymmetry of the smokers in the population at-risk of developing stroke was significantly higher than that of the non-smokers. (B) In both right and left Dorsal Index Fingers, the AF asymmetry of the smokers in the population at-risk of developing stroke was significantly higher than that of the non-smokers. The number of the healthy non-smokers, the non-smokers in the population at-risk of developing stroke, and the smokers in the population at-risk of developing stroke was 56,130, and 39, respectively. \*\*\*,  $p < 0.001$ .

**Fig. 5. The green AF intensity of the fingernails and the skin of Dorsal Index Fingers, Vetroforefingers and the left Centrametacarpus of the smokers in AIS population was significantly higher than that of the non-smokers.** (A) The green AF intensity of the fingernails of the smokers in AIS population was significantly higher than that of the non-smokers. (B) The green AF intensity of the skin of Dorsal Index Fingers of the smokers in AIS population was significantly higher than that of the non-smokers. (C) The green AF intensity of the skin of Vetroforefingers of the



smokers in AIS population was significantly higher than that of the non-smokers. (D)

The green AF intensity of the skin of left Centrametacarpus of the smokers in AIS population was significantly higher than that of the non-smokers. The number of the healthy non-smokers, the non-smokers in the AIS population, and the smokers in the AIS population was 56, 33 and 30, respectively. \*,  $p < 0.05$  \*\*;  $p < 0.01$  \*\*\*;  $p < 0.001$ .

**Fig. 6. The AF asymmetry of the fingernails and the skin of Centrametacarpus of the smokers in AIS population was significantly higher than that of the non-smokers.**

(A) The AF asymmetry of the fingernails of the smokers in AIS population

was significantly higher than that of the non-smokers. (B) The AF asymmetry of the

skin of Dorsal Index Fingers of the smokers in AIS population was significantly higher

than that of the non-smokers. The number of the healthy non-smokers, the non-smokers

in the AIS population, and the smokers in the AIS population was 56, 33 and 30,

respectively. \*,  $p < 0.05$  \*\*;  $p < 0.01$  \*\*\*;  $p < 0.001$ .

**Fig. 7. The green AF intensity of the fingernails and certain positions of the skin of the male persons in the natural populations were significantly different from those of the female persons.**

(A) In both right and left fingernails, the AF intensity of the male persons

was significantly higher than that of the female persons. (B) In both

right and left Dorsal Index Fingers, the AF intensity of the male persons was

significantly higher than that of the female persons. (C) In right Centremetacarpus, the

AF intensity of the male persons was significantly higher than that of the female persons.

(D) In right Dorsal Centremetacarpus, the AF intensity of the male persons was significantly higher than that of the female persons. (E) In the left Ventriantebrachium, the AF intensity of the male persons was significantly lower than that of the female persons. The number of the male persons and female persons in the natural populations was 160 and 346, respectively. \*,  $p < 0.05$  \*\*;  $p < 0.01$  \*\*\*;  $p < 0.001$ . #;  $p < 0.05$ ; ##,  $p < 0.01$  (#: student t-test).

**Fig. 8. The AF asymmetry of the fingernails and certain positions of the skin of the Dorsal Index Fingers of the male persons in the natural populations was significantly higher than that of the female persons.** (A) Compared with the AF asymmetry of the fingernails of the female persons, the AF asymmetry of the skin of Dorsal Index Fingers of the male persons was significantly higher. (B) Compared with the AF asymmetry of the skin of Dorsal Index Fingers of the female persons, the AF asymmetry of the skin of Dorsal Index Fingers of the male persons was significantly higher. The number of the male persons and female persons in the natural populations was 160 and 346, respectively. ###,  $p < 0.001$  (#: student t-test).

**Fig. 9. There were significant differences among male smokers, male non-smokers, female smokers and female non-smokers in the green AF intensity of the fingernails and the skin Dorsal Index Fingers in the natural populations.** (A) In both right and left fingernails, the AF intensity of the male smokers was significantly higher than that of the male non-smokers, female non-smokers and female smokers. (B) In both right and left Dorsal Index Fingers, the AF intensity of the male smokers was significantly higher than that of the male non-smokers and female non-smokers. The

number of male smokers, male non-smokers, female smokers and female non-smokers in the natural populations was 86, 54, 277 and 4, respectively. \*,  $p < 0.05$ ; \*\*\*,  $p < 0.001$ . ##,  $p < 0.01$ ; ###,  $p < 0.001$  (#: student t-test).

**Fig. 10. There were significant differences among male smokers, male non-smokers, female smokers and female non-smokers in the AF asymmetry of the fingernails and the skin Dorsal Index Fingers in the natural populations.** (A) The AF asymmetry of the fingernails of the male smokers was significantly higher than that of the male non-smokers and female non-smokers. (B) The AF asymmetry of the skin of Dorsal Index Fingers of the male smokers was significantly higher than that of the male non-smokers and female non-smokers. The number of male smokers, male non-smokers, female smokers and female non-smokers in the natural populations was 86, 54, 277 and 4, respectively. \*\*\*,  $p < 0.001$ . ###,  $p < 0.001$  (#: student t-test).

#### **Legends of Supplemental Figures:**

**Supplemental Fig. 1. The green AF intensity of the skin at other examined positions of the smokers in natural populations was not significantly different from that of the non-smokers.** The number of the non-smokers and the smokers was 280 and 47, respectively.

**Supplemental Fig. 2. The AF asymmetry of the skin at other examined positions of the smokers in natural populations not significantly different from that of the**

**non-smokers.** The number of the non-smokers and the smokers was 280 and 47, respectively.

**Supplemental Fig. 3. The green AF intensity of the skin of at other examined positions of the smokers in the population at-risk of stroke not significantly different from that of the non-smokers.** The number of the healthy non-smokers, the non-smokers in the population at-risk of developing stroke, and the smokers in the population at-risk of developing stroke was 56,130, and 39, respectively.

**Supplemental Fig. 4. The AF asymmetry of the skin at other examined positions of the smokers in the population at-risk of stroke not significantly different from that of the non-smokers.** The number of the healthy non-smokers, the non-smokers of the population at-risk of developing stroke, and the smokers of the population at-risk of developing stroke was 56,130, and 39, respectively.

**Supplemental Fig. 5. The green AF intensity of the skin at other examined positions of the smokers in AIS population not significantly different from that of the non-smokers.** The number of the healthy non-smokers, the non-smokers in the AIS population, and the smokers in the AIS population was 56, 33 and 30, respectively.

**Supplemental Fig. 6. The AF asymmetry of the skin at other examined positions of the smokers in AIS population not significantly different from that of the non-**

**smokers.** The number of the healthy non-smokers, the non-smokers in the AIS population, and the smokers in the AIS population was 56, 33 and 30, respectively.

**Supplemental Fig. 7. The green AF intensity of the skin at other examined positions of the male persons in natural populations was not significantly different from that of the non-smokers.** The number of the male persons and female persons was 160 and 346, respectively.

**Supplemental Fig. 8. The AF asymmetry of the skin at other examined positions of the male persons in natural populations was not significantly different from that of the non-smokers.** The number of the male persons and female persons was 160 and 346, respectively.

**Supplemental Fig. 9. No significant difference was observed between the green AF intensity of the male smokers and that of the male non-smokers, female non-smokers and female smokers at other examined positions of the skin.** The number of the male smokers, male non-smokers, female non-smokers and female smokers was 86, 54, 277 and 4, respectively.

**Supplemental Fig. 10. No significant difference was observed between the AF asymmetry of the male smokers and that of the male non-smokers, female non-smokers and female smokers at other examined positions of the skin.** The number

of the male smokers, male non-smokers, female non-smokers and female smokers was 86, 54, 277 and 4, respectively.

■ Non-smokers  
■ Smokers

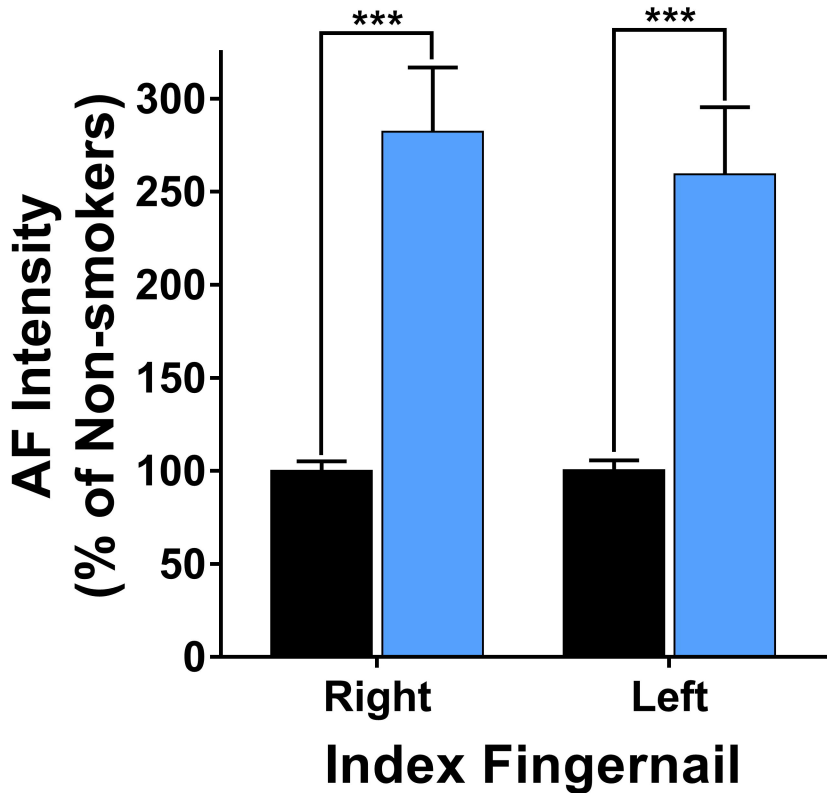

**AF Intensity**

**(% of Non-smokers)**

■ Non-smokers  
■ Smokers

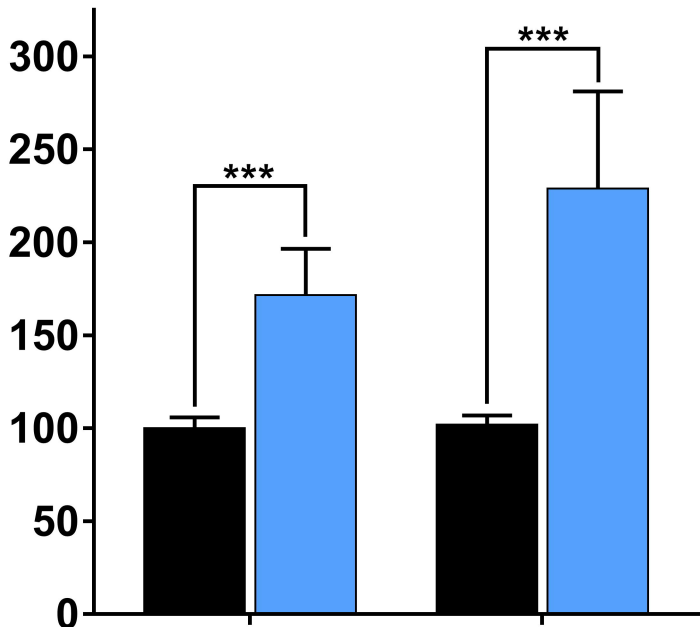

**Right**

**Left**

**Dorsal Index Finger**



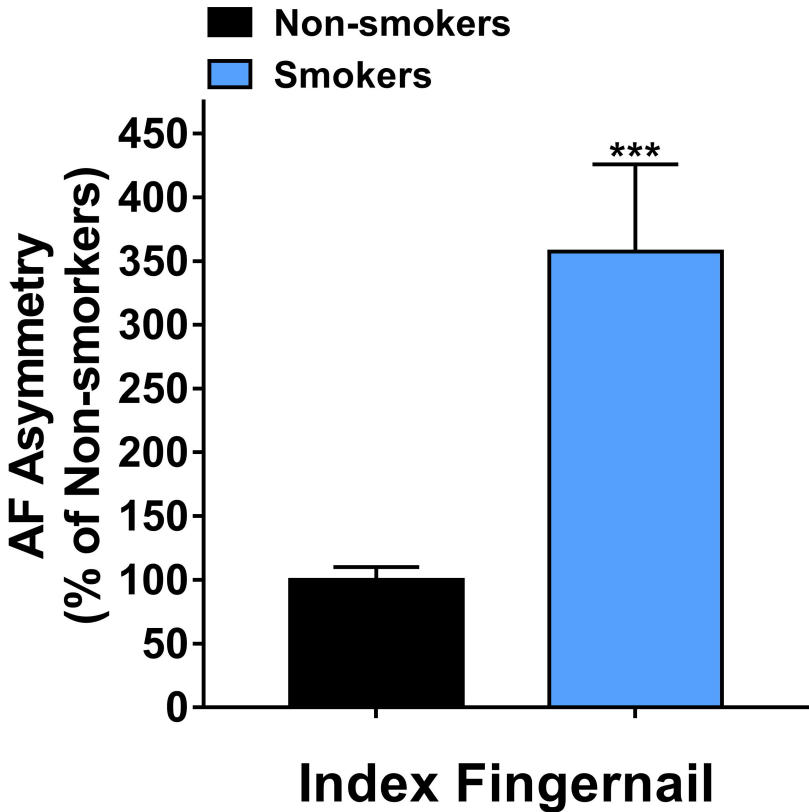

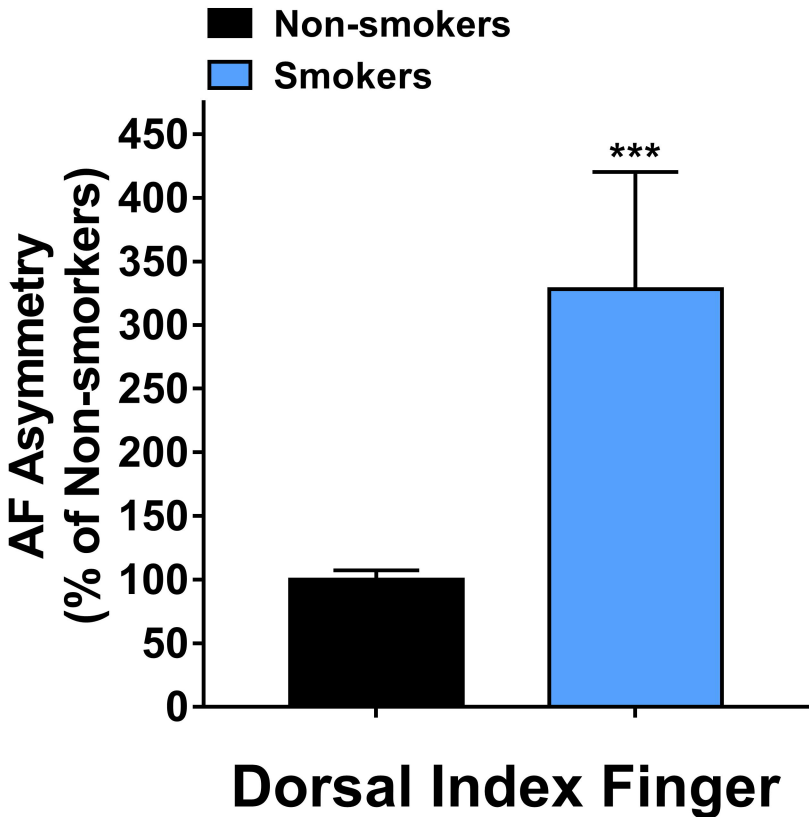

- Healthy Non-smokers
- Non-smokers at Risk
- Smokers at Risk

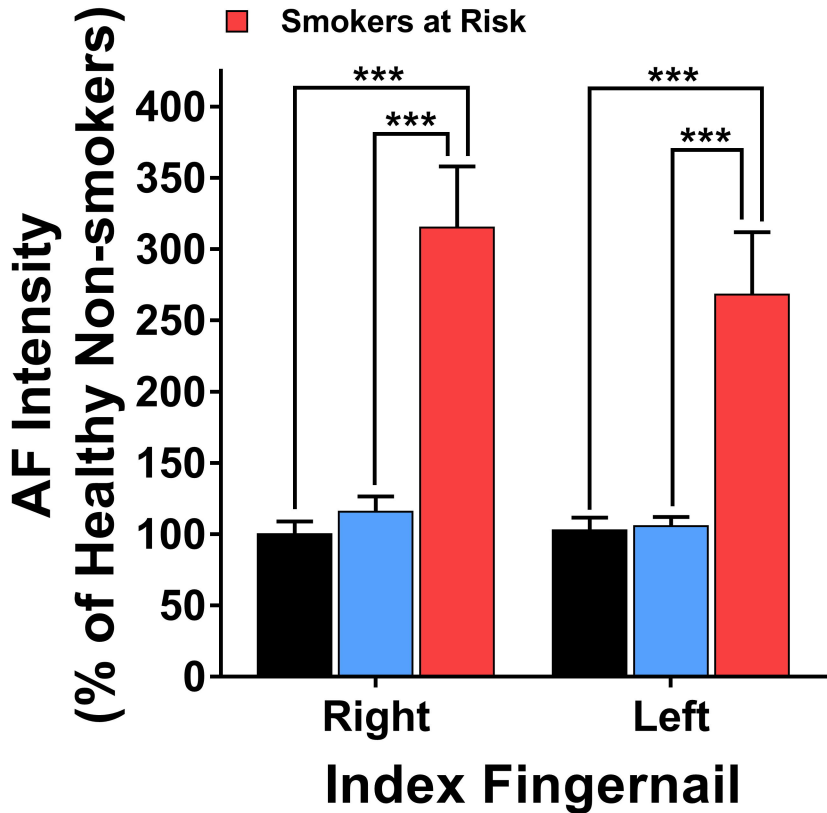

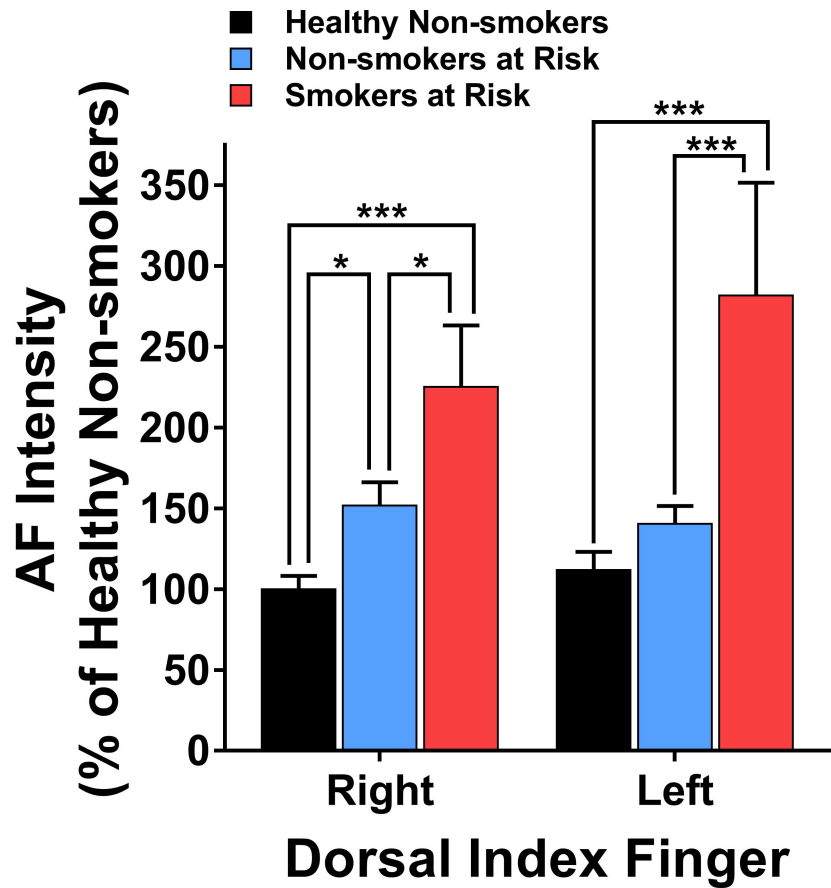

# AF Asymmetry

(% of Healthy Non-smokers)

- Healthy Non-smokers
- Non-smokers at Risk
- Smokers at Risk

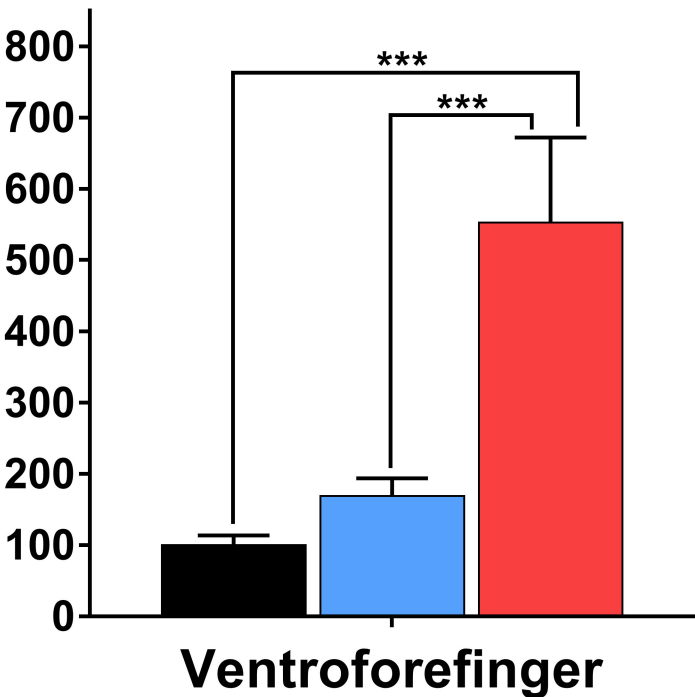

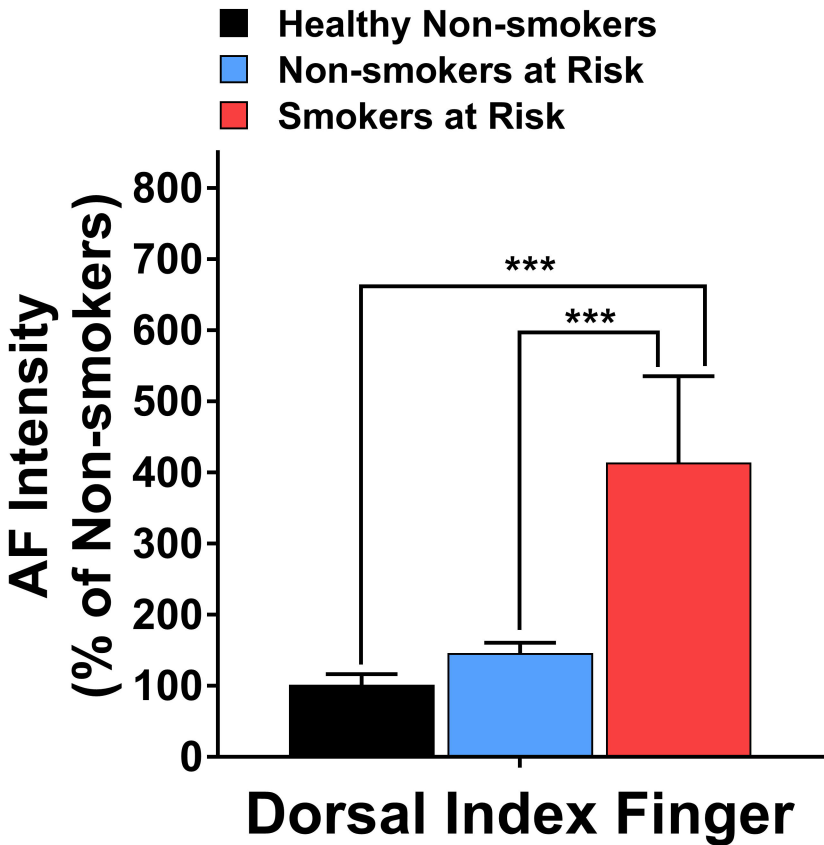

- Healthy Non-smokers
- AIS Group (Non-smokers)
- AIS Group (Smokers)

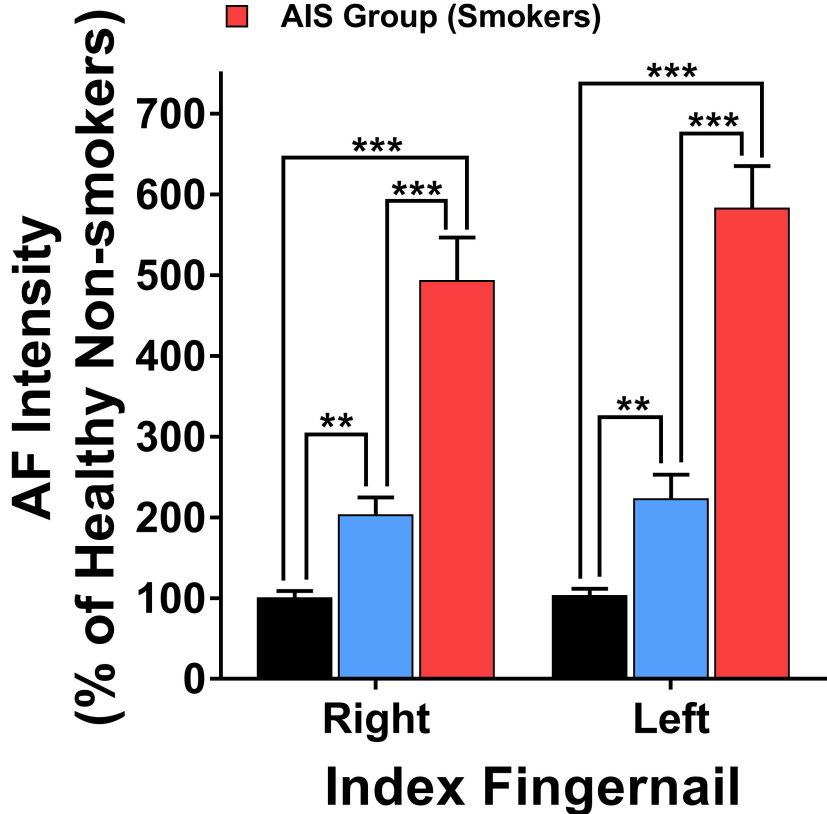

- Healthy Non-smokers
- AIS Group (Non-smokers)
- AIS Group (Smokers)

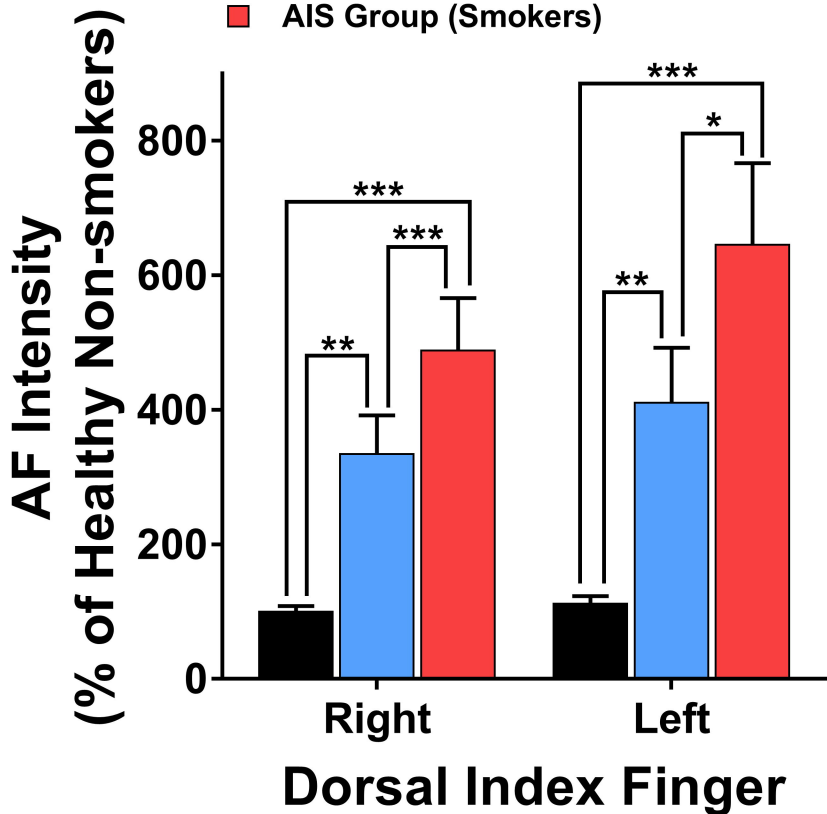



- Healthy Non-smokers
- AIS Group (Non-smokers)
- AIS Group (Smokers)

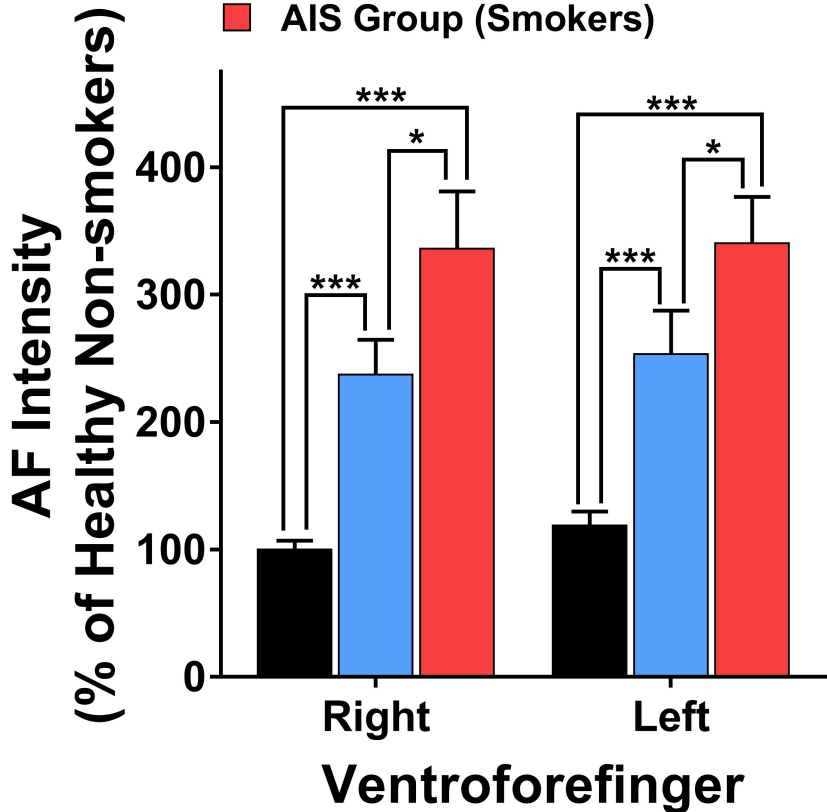

- Healthy Non-smokers
- AIS Group (Non-smokers)
- AIS Group (Smokers)

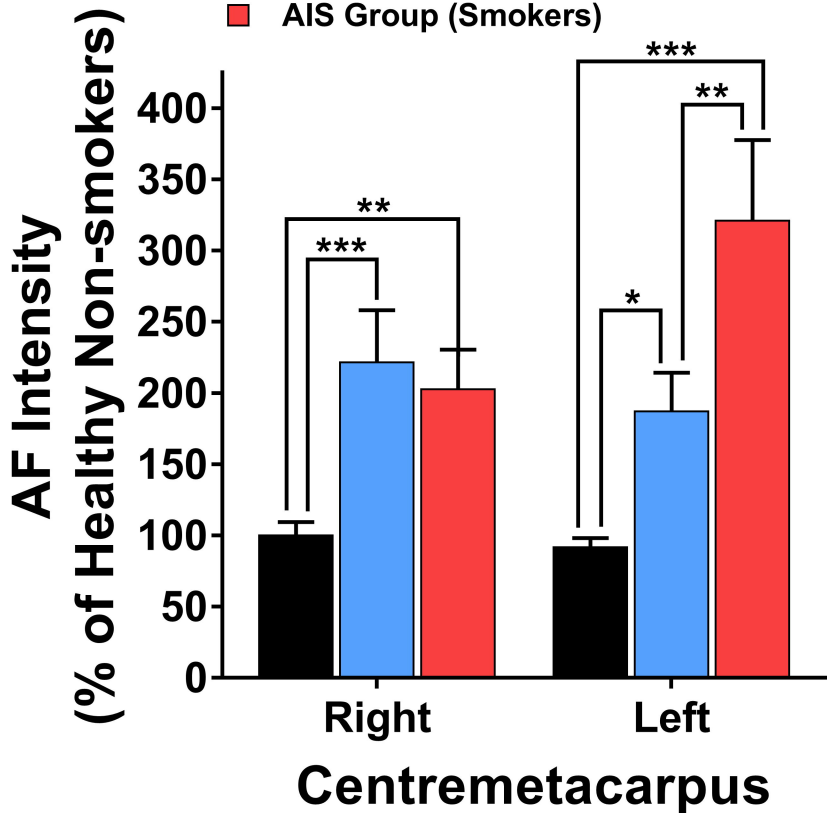

**AF Intensity**

**(% of Healthy Non-smokers)**

- Healthy Non-smokers
- AIS Group (Non-smokers)
- AIS Group (Smokers)

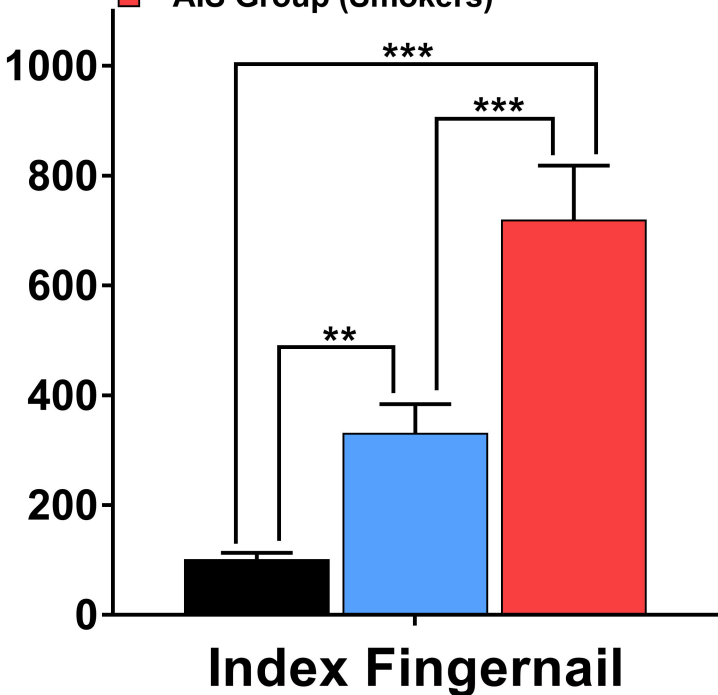

**AF Intensity**

**(% of Healthy Non-smokers)**

- Healthy Non-smokers
- AIS Group (Non-smokers)
- AIS Group (Smokers)

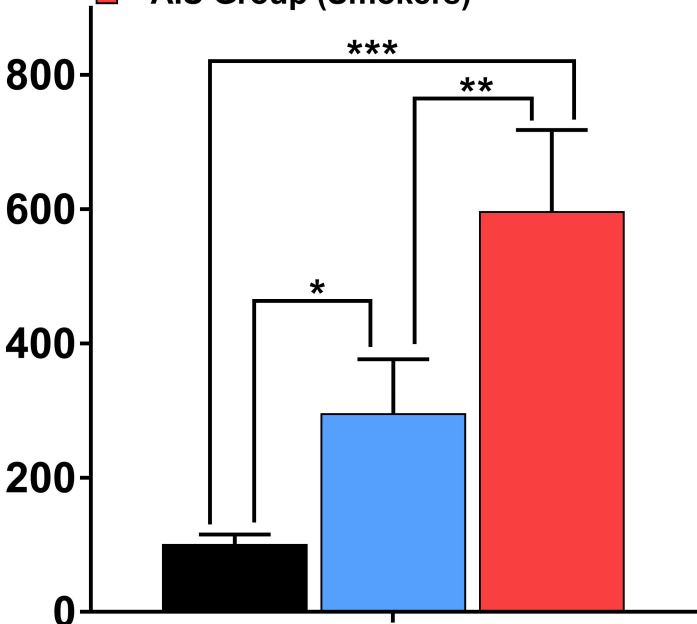

**Centremetacarpus**

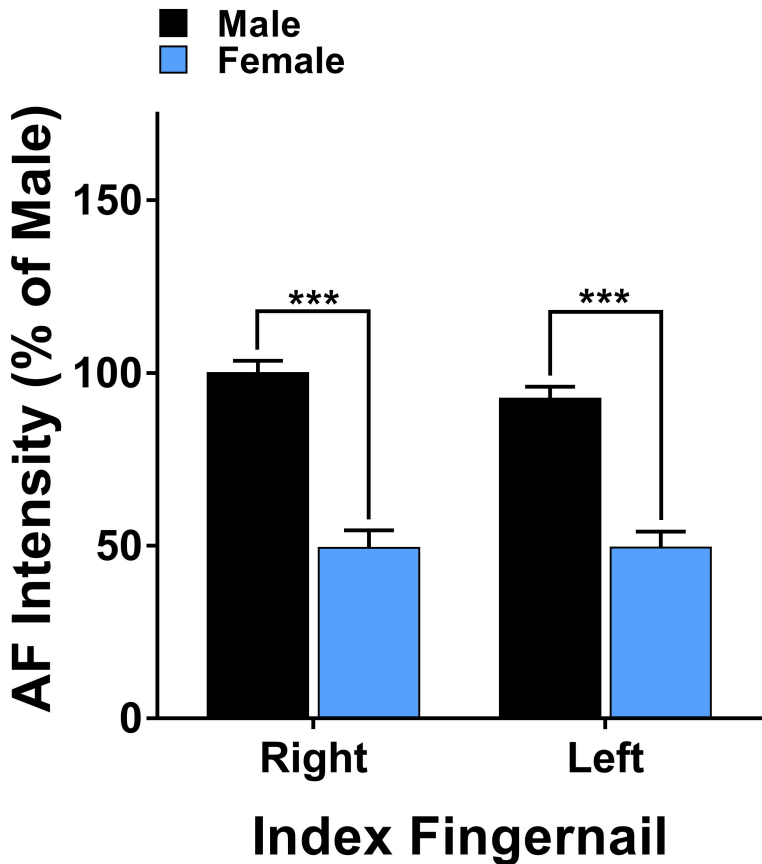

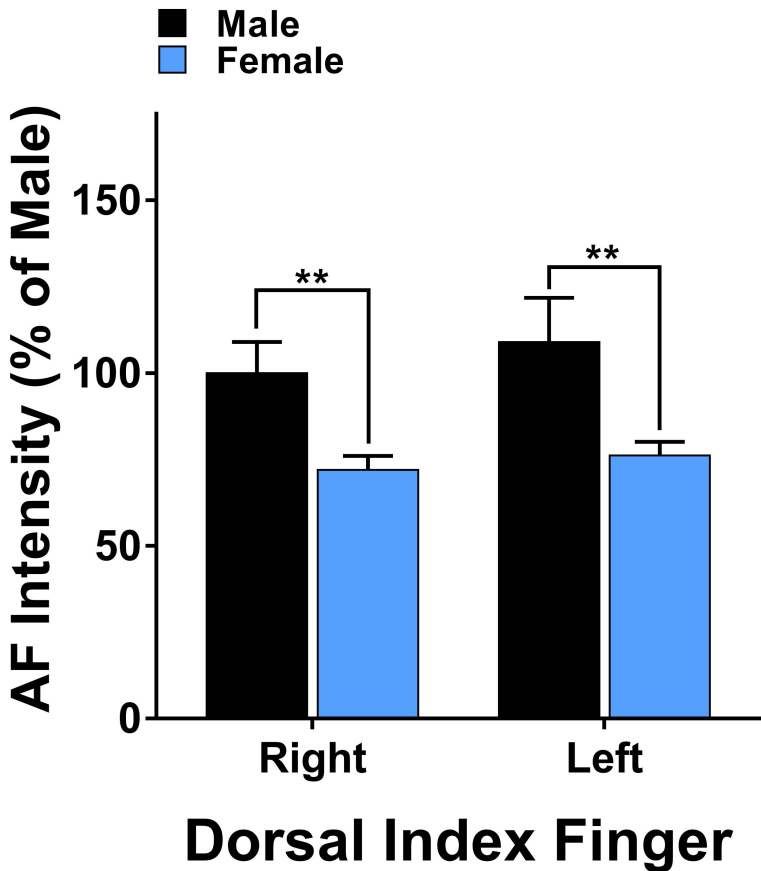

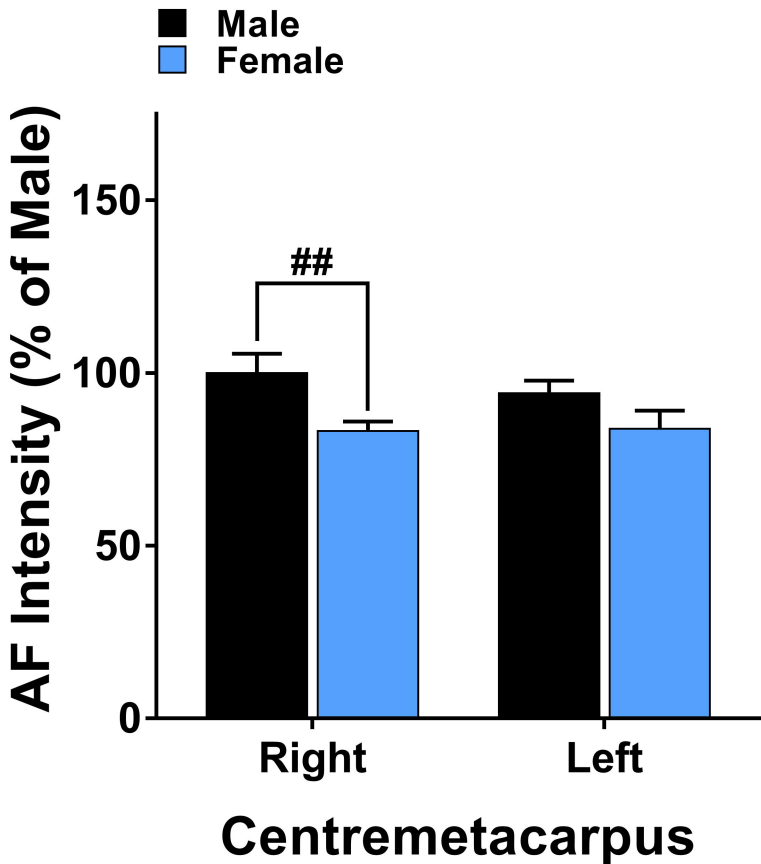

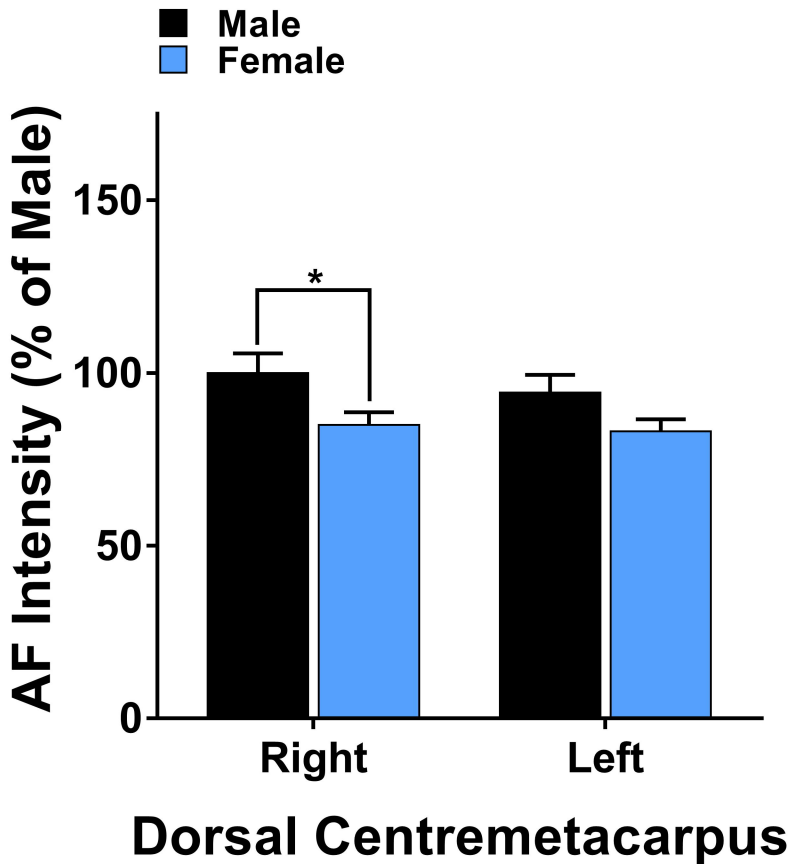



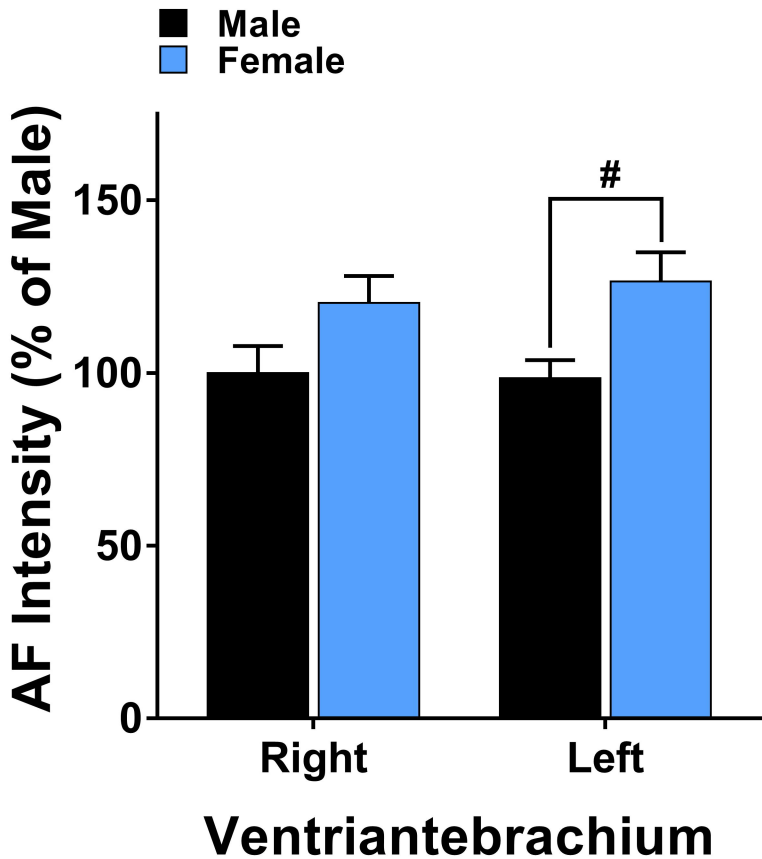

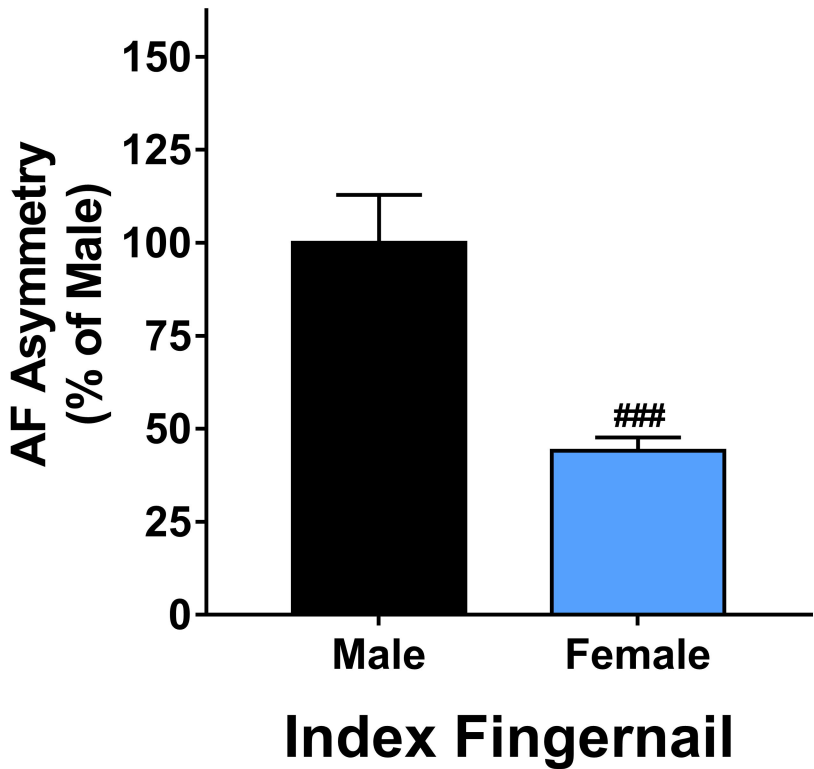

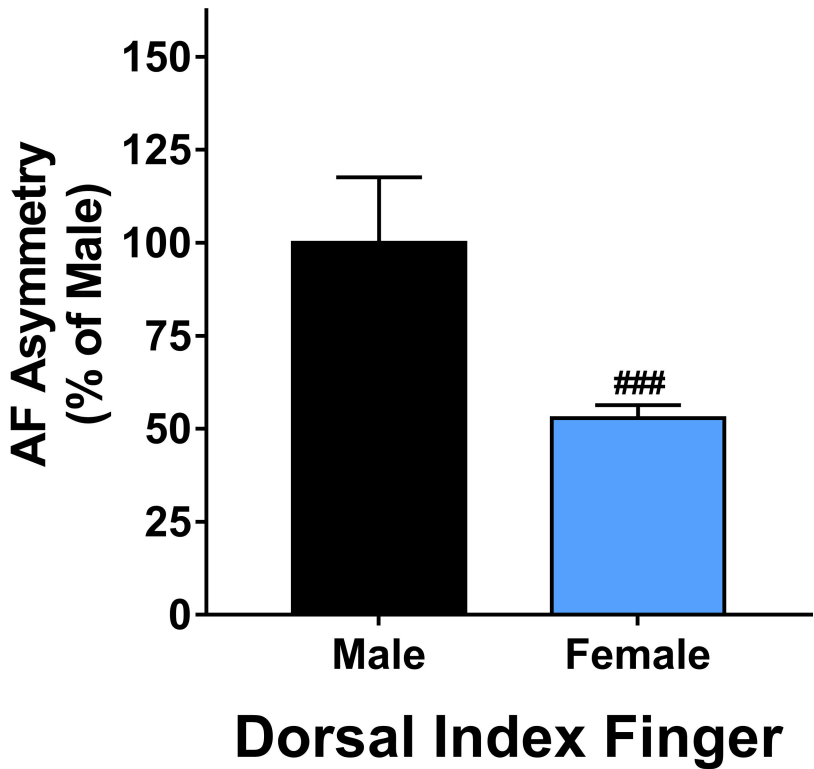

- Non-smokers (Male)
- Smokers (Male)
- Non-smokers (Female)
- Smokers (Female)

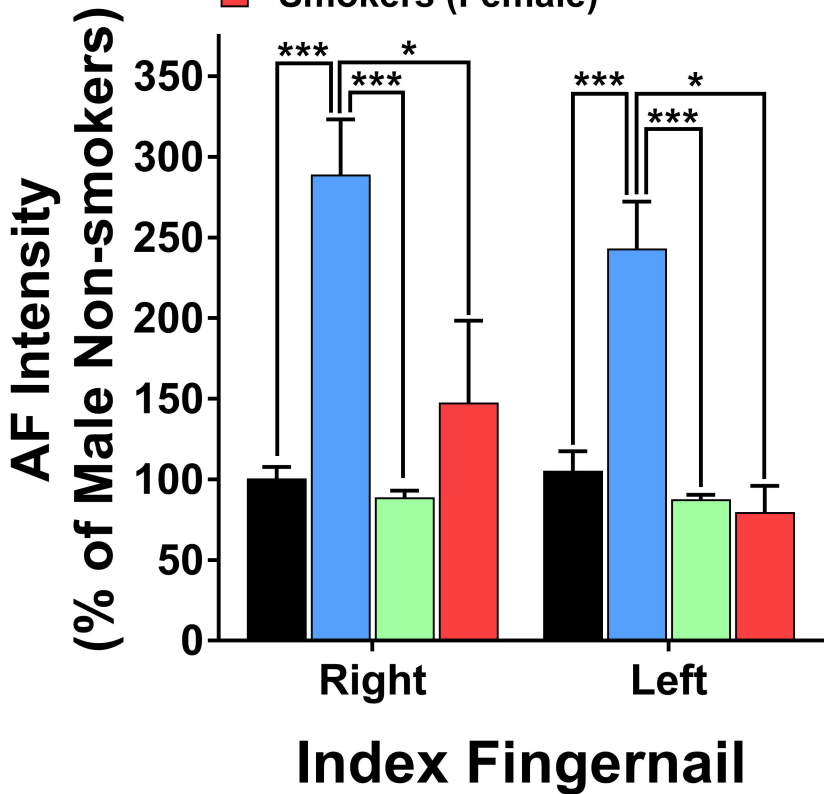

- Non-smokers (Male)
- Smokers (Male)
- Non-smokers (Female)
- Smokers (Female)

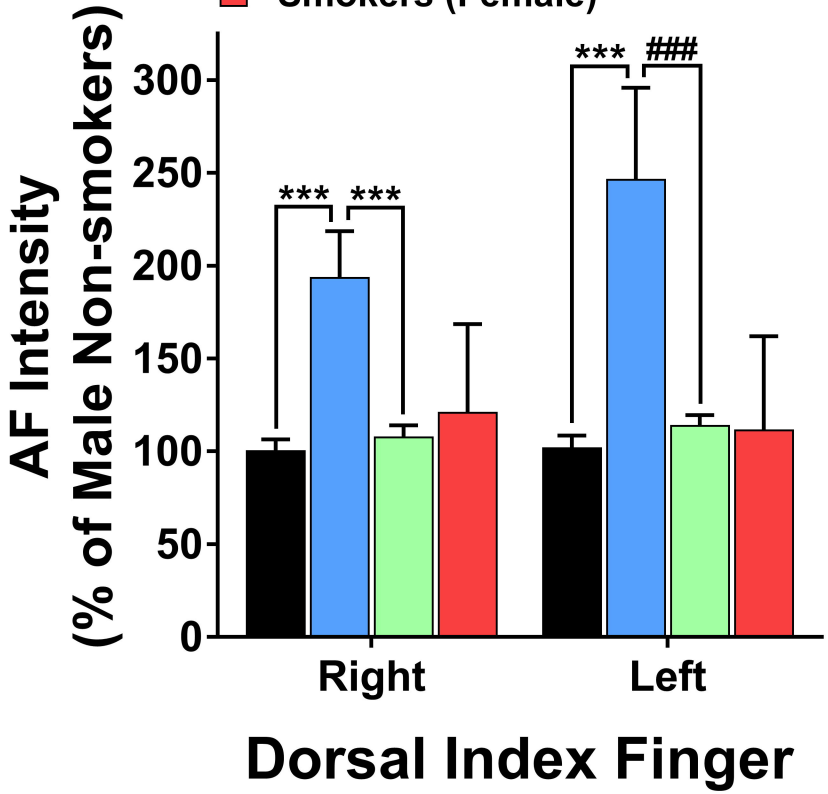

- Non-smokers (Male)
- Smokers (Male)
- Non-smokers (Female)
- Smokers (Female)

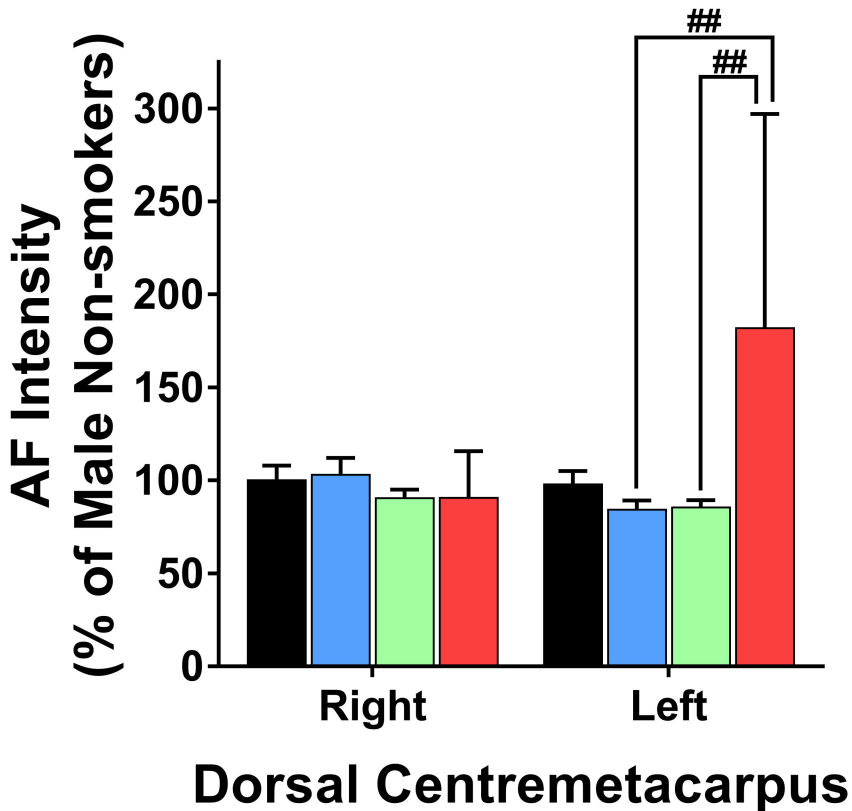

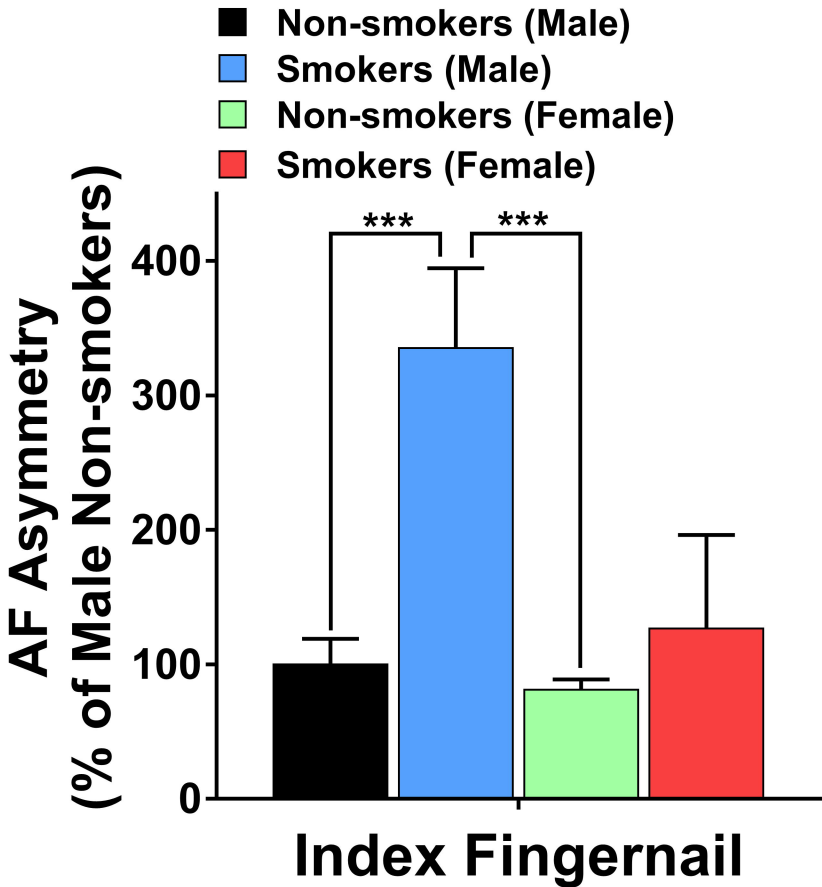

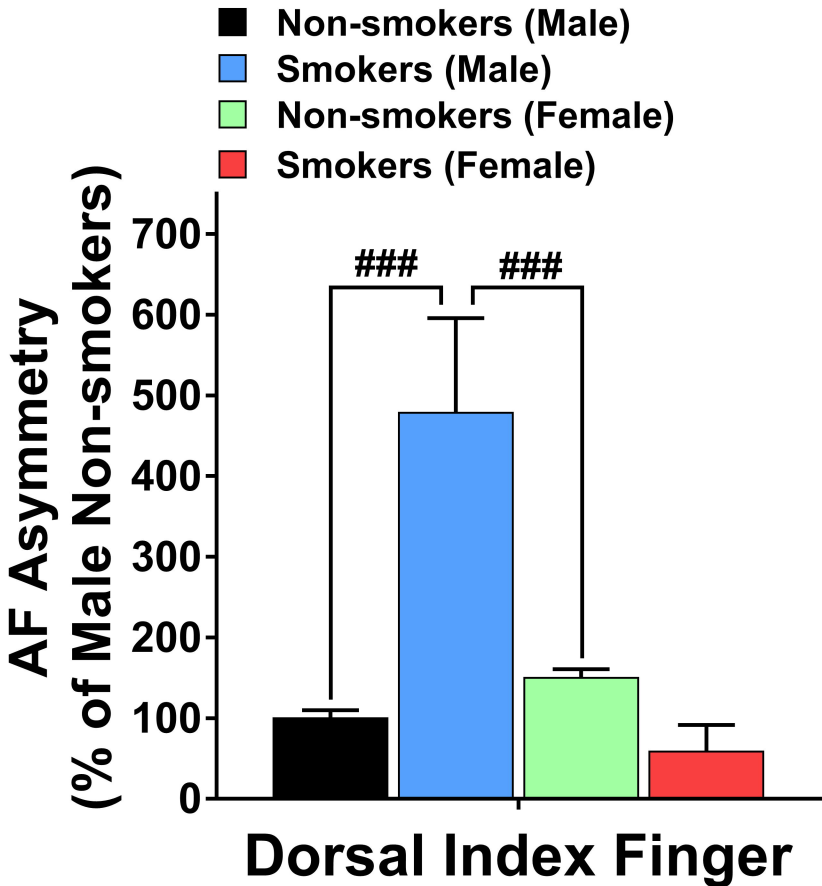

Source: https://medrxiv.org/content/10.1101/2020.07.24.20161620v1.full.pdf
